# Supplementary material for: Cryptic genetic variation in a heat shock protein modifies the outcome of a mutation affecting epidermal stem cell development in C. elegans
Source: PubMed Central journal article supplement (PMC8166903; doi:10.1038/s41467-021-23567-1), 2021-05-31
Supplement: 41467_2021_23567_MOESM4_ESM.pdf [file 41467_2021_23567_MOESM4_ESM.pdf]

## **Description of Additional Supplementary Files**

File Name: Supplementary Data 1

Description: Genetic variants within QTL regions on chromosome II and III.

File Name: Supplementary Data 2

Description: Strains used in this study.

File Name: Supplementary Data 3

Description: Primers used in this study (general oligos, genotyping primers and smFISH probes).
